# Supplementary material for: Addition of oh8dG to Cardioplegia Attenuated Myocardial Oxidative Injury through the Inhibition of Sodium Bicarbonate Cotransporter Activity
Source: MDPI journal article supplement (doi:10.3390/antiox11091641), 2022-08-24
Supplement: s1 [file s1]

# **Addition of oh8dG to cardioplegia attenuated myocardial oxidative injury through the inhibition of sodium bicarbonate cotransporter activity**

MinJeong Ji <sup>1</sup>, KukHui Son <sup>2,\*</sup> and JeongHee Hong <sup>1\*</sup>

# Supplementary Figure S1. Ji *et al.*

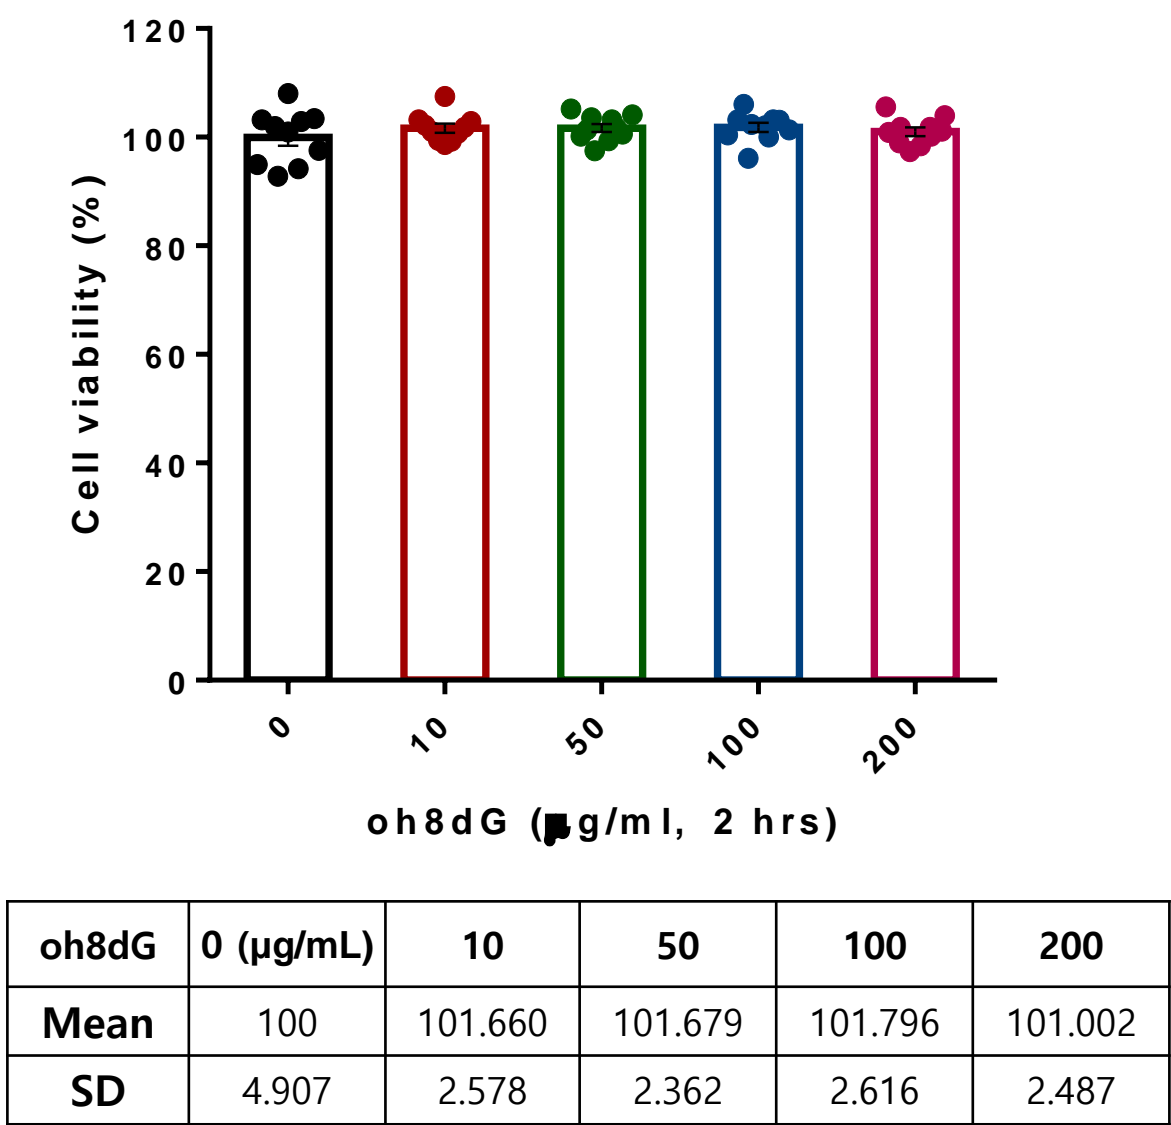

**Supplementary Figure S1. The dose-dependent cell viability of oh8dG-treated MRC5 cells**

Cellular viability was measured by MTT assay.

# Supplementary Figure S2. Ji *et al.*

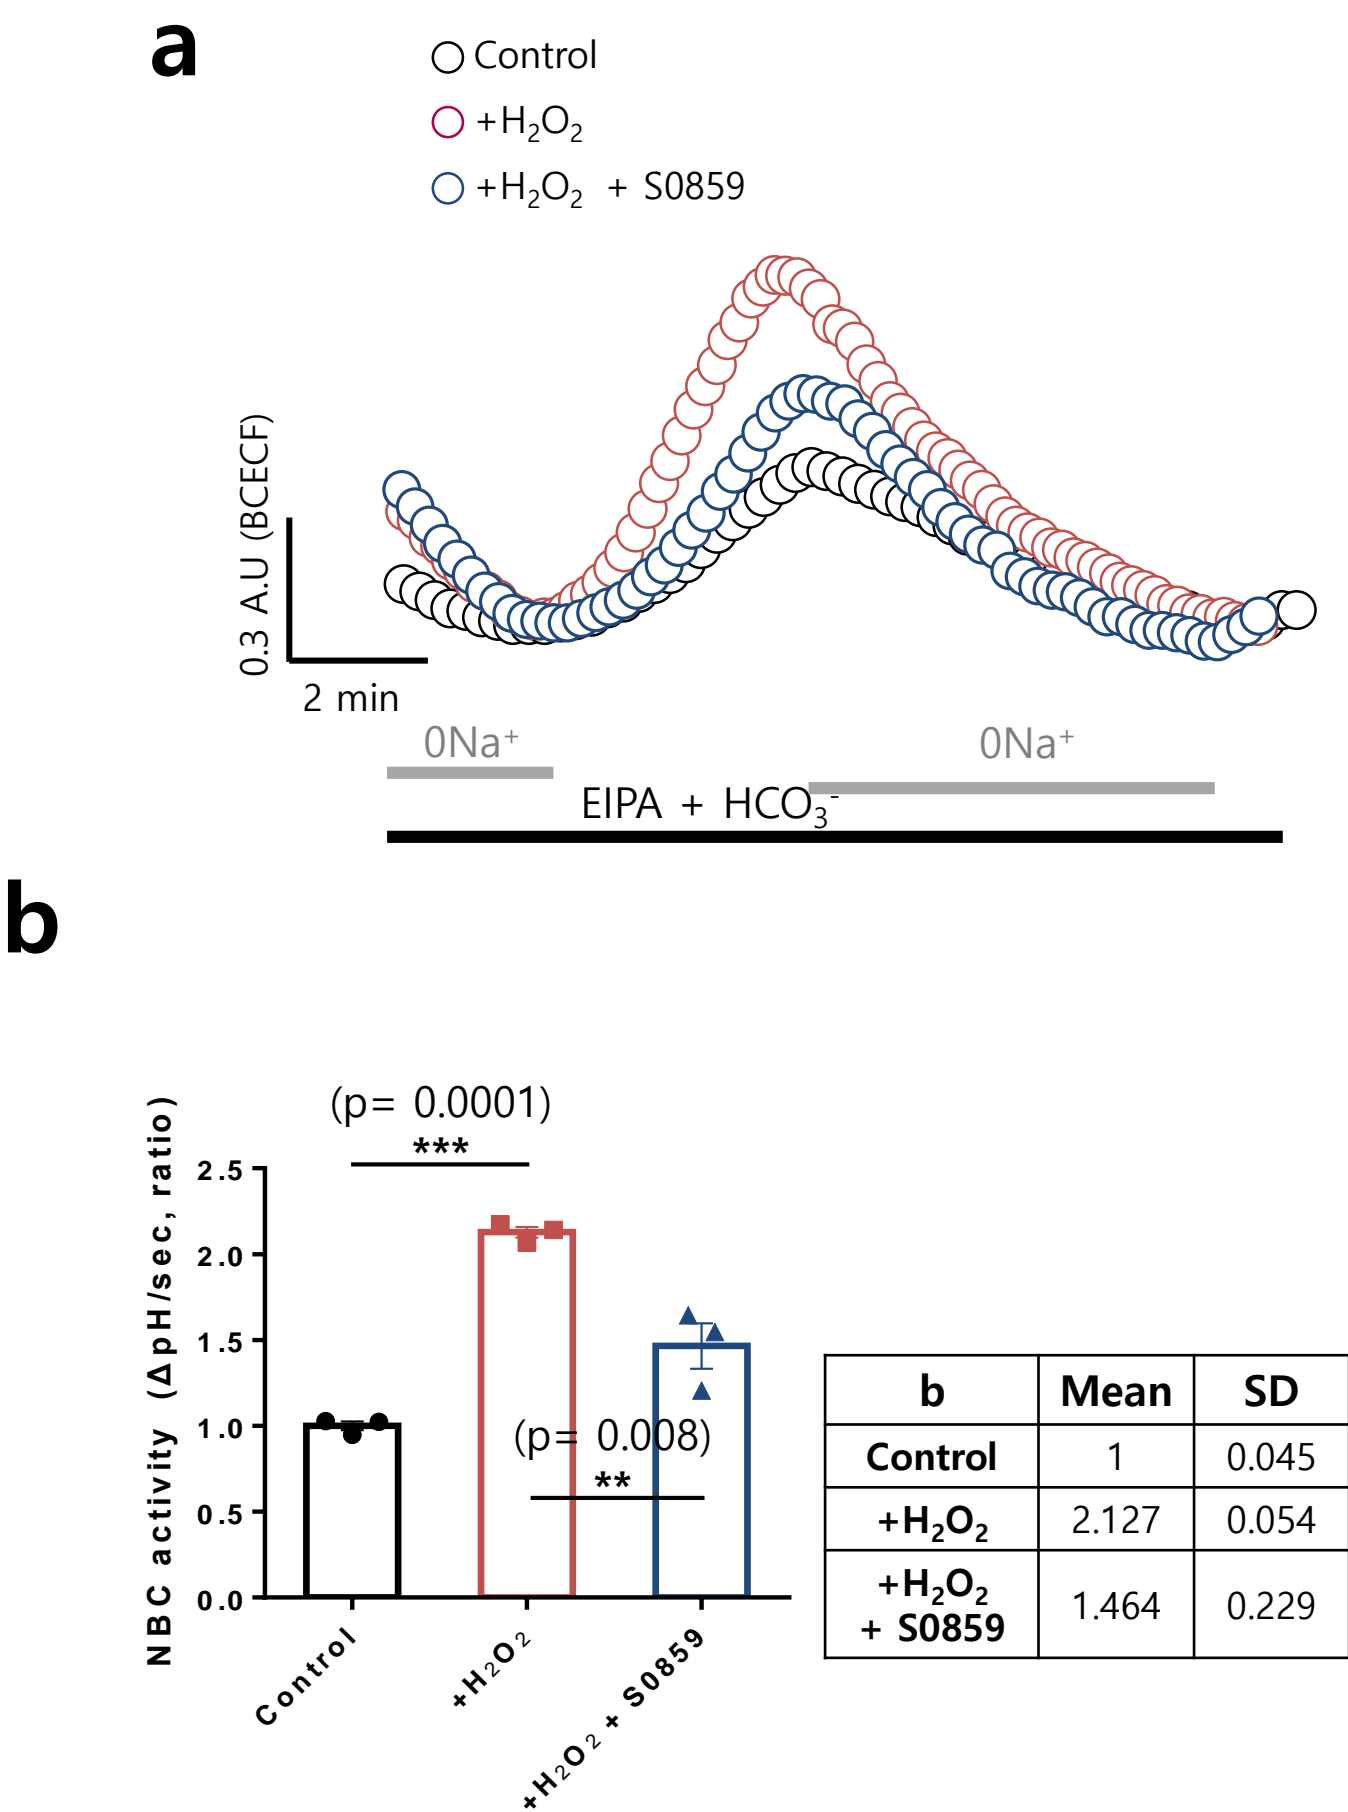

**Supplementary Figure S2. The effect of NBC inhibitor S0859 on H<sub>2</sub>O<sub>2</sub>-treated A549 cells**

**(a)** NBC activity was measured by measuring changes in pH<sub>i</sub> which incubated with H<sub>2</sub>O<sub>2</sub> in the presence or absence of NBC inhibitor S0859 (40 μM) for 1 hr. **(b)** The bars present mean ± SEM (n = 3, \*\*p < 0.01, \*\*\*p < 0.001).

# Supplementary Figure S3. Ji *et al.*

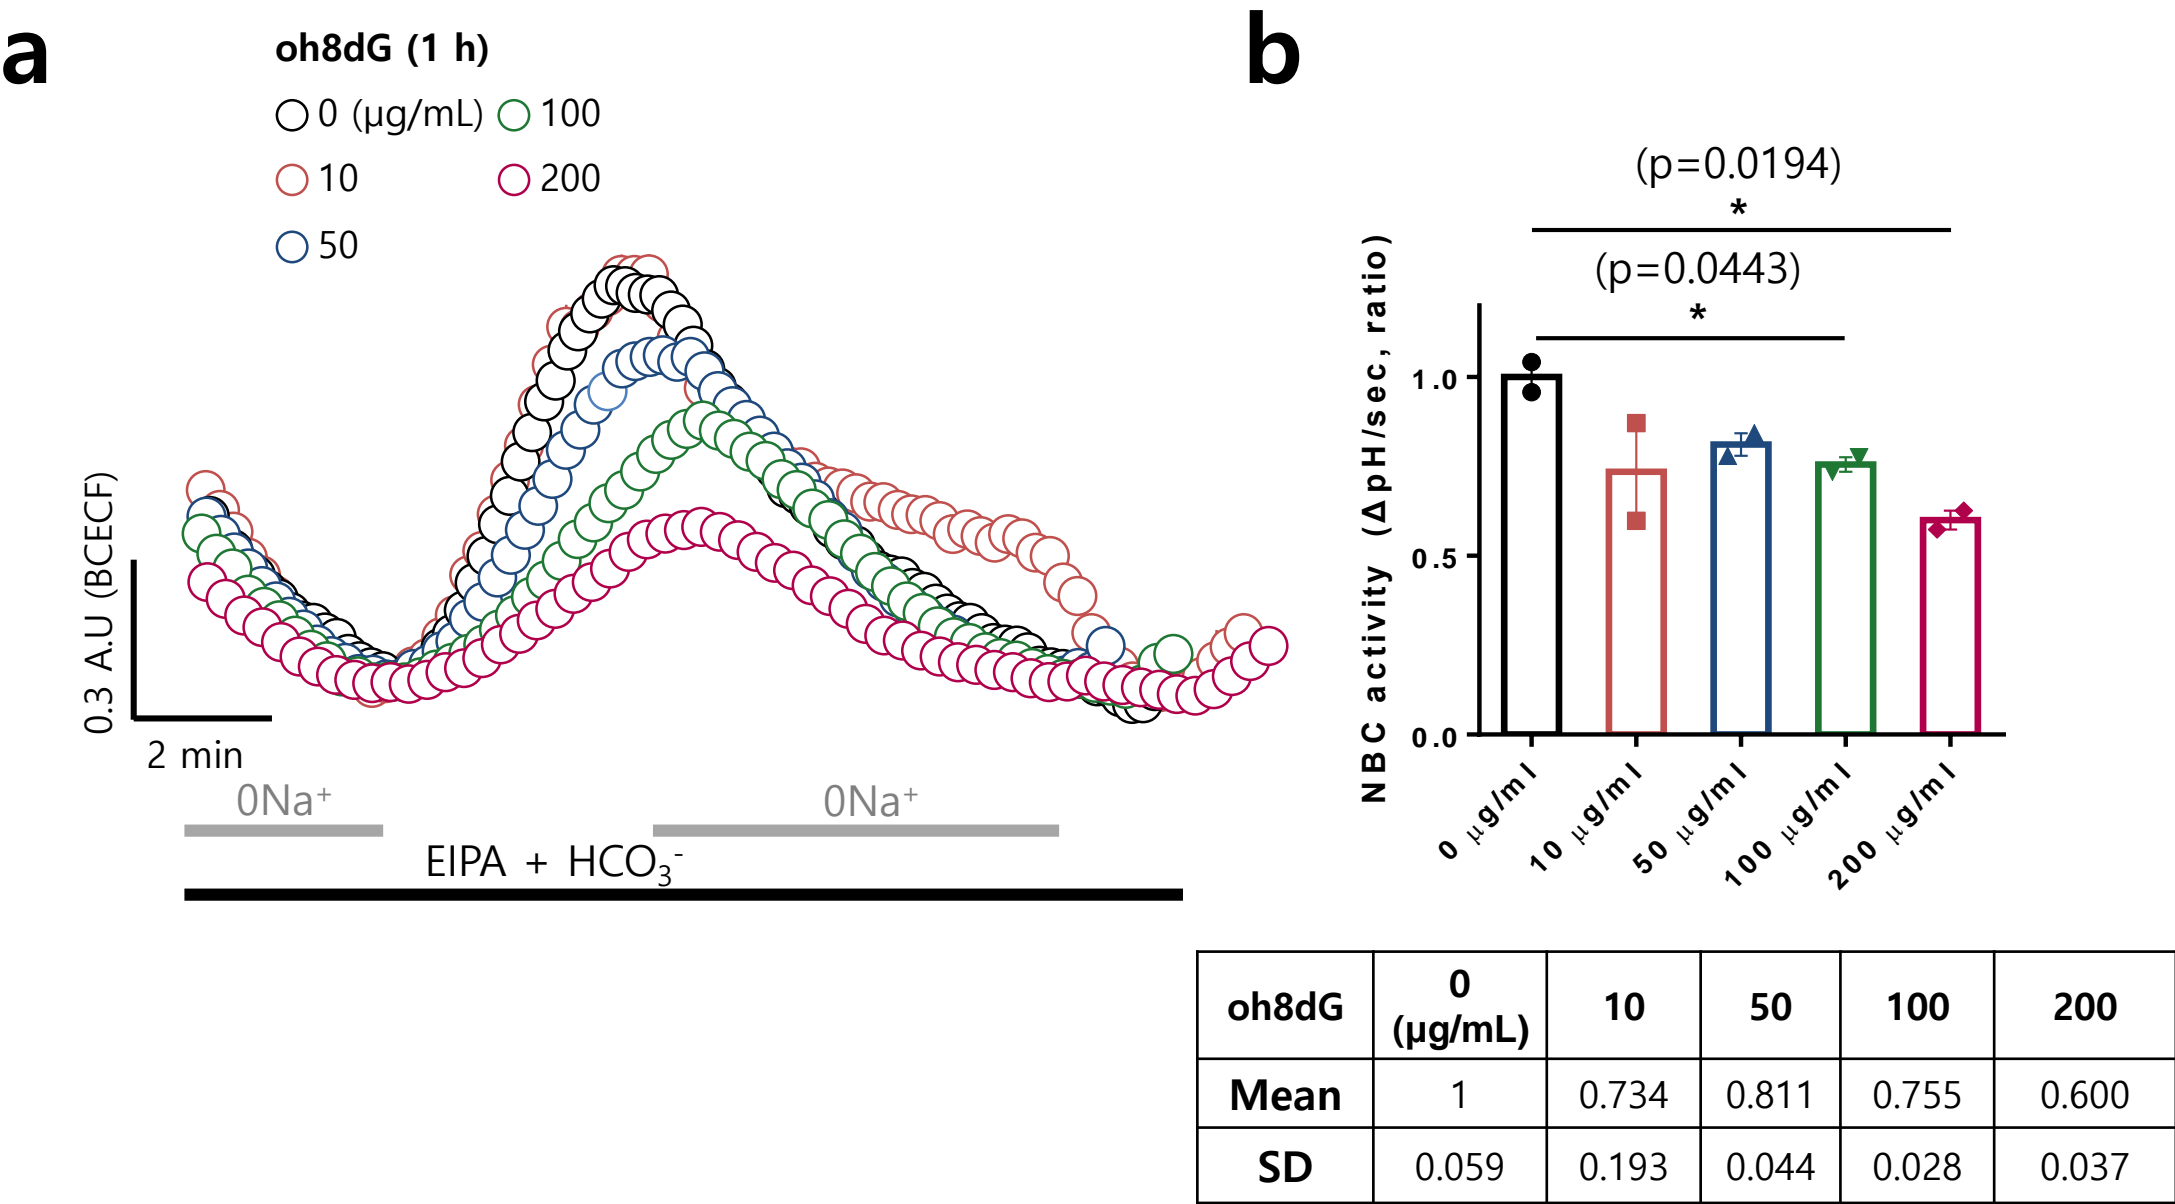

**Supplementary Figure S3. The dose-dependent NBC activity of oh8dG-treated A549 cells**

**(a)** NBC activity was measured by measuring changes in pH<sub>i</sub> which incubated with dose-dependent oh8dG. **(b)** The bars present mean ± SEM (n = 2, \*p < 0.05).
